# Supplementary material
Source: MDPI journal article supplement (https://www.mdpi.com/2073-4441/15/17/3115)
Supplement: s1 [file s1 › water-2544777-supplementary.pdf]

Supporting Information for

# Utilizing Entropy-Based Method for Rainfall Network Design in Huaihe River Basin, China

Jian Liu <sup>1,2,\*</sup>, Yanyan Li <sup>1,2</sup>, Yuankun Wang <sup>3</sup> and Pengcheng Xu <sup>4</sup>

<sup>1</sup> Water Resources Research Institute of Shandong Province, Jinan 250014, China;  
liyanyan026@outlook.com

<sup>2</sup> Shandong Province Key Laboratory of Water Resources and Environment, Jinan 250014, China

<sup>3</sup> School of Water Resources and Hydropower Engineering, North China Electric Power University,  
Beijing 102206, China; yuankunw@ncepu.edu.cn

<sup>4</sup> College of Hydraulic Science and Engineering, Yangzhou University, Yangzhou 225008, China;  
m18994113495@163.com

\* Correspondence: water\_liujian@163.com

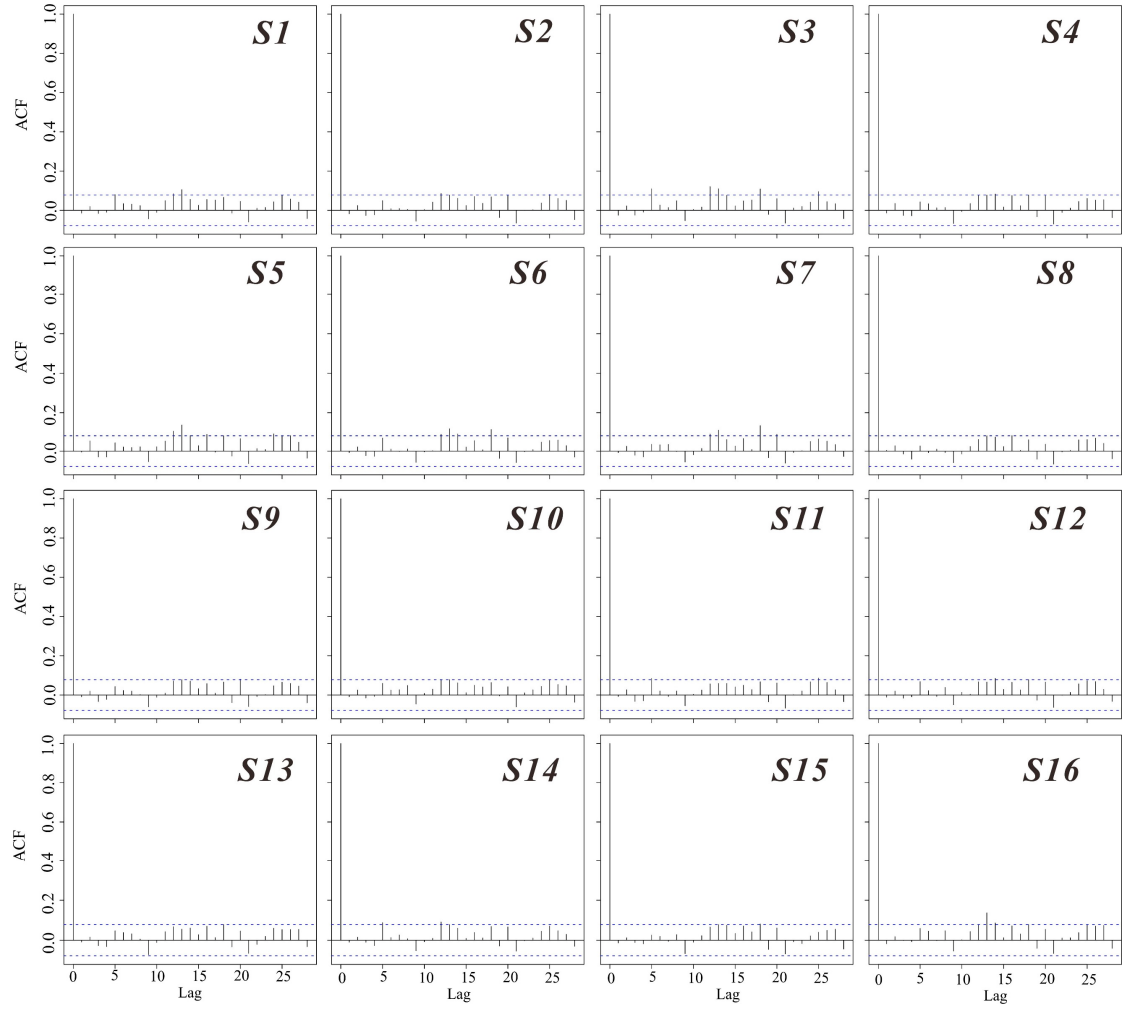

**Figure S1(a).** Results of autocorrelation tests for processed precipitation series of selected 16 stations with  $n_{EI} = 3$ . ACF: autocorrelation function value. ACF is between the two blue dashed lines in the figure, which recommends processed data can obey the independent and identically distributed assumption (*i.i.d.*). On the contrary, ACF value exceeds two blue dashed lines which denotes the data could not stick to the *i.i.d.* assumption.

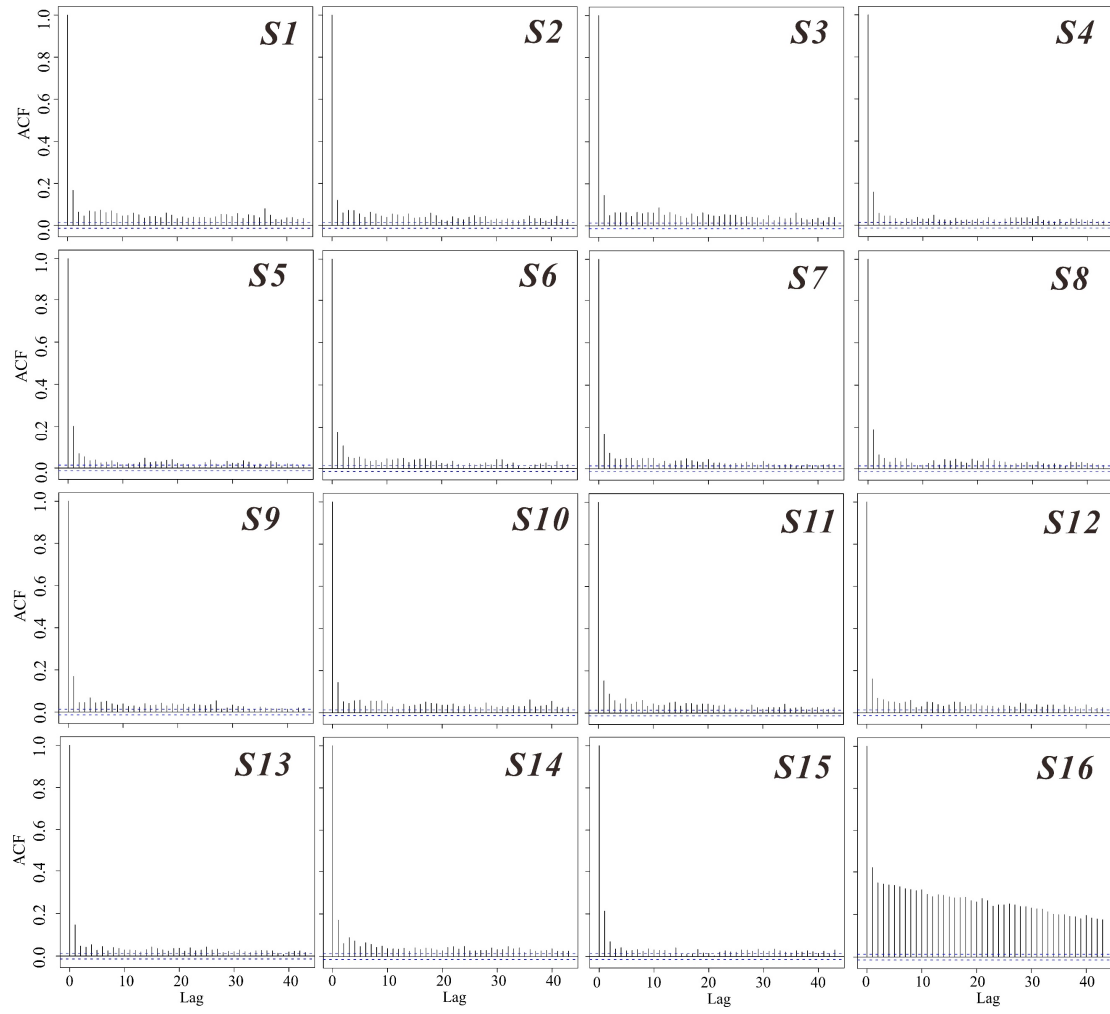

**Figure S1(b).** Results of autocorrelation tests for original daily precipitation series of selected 16 stations.

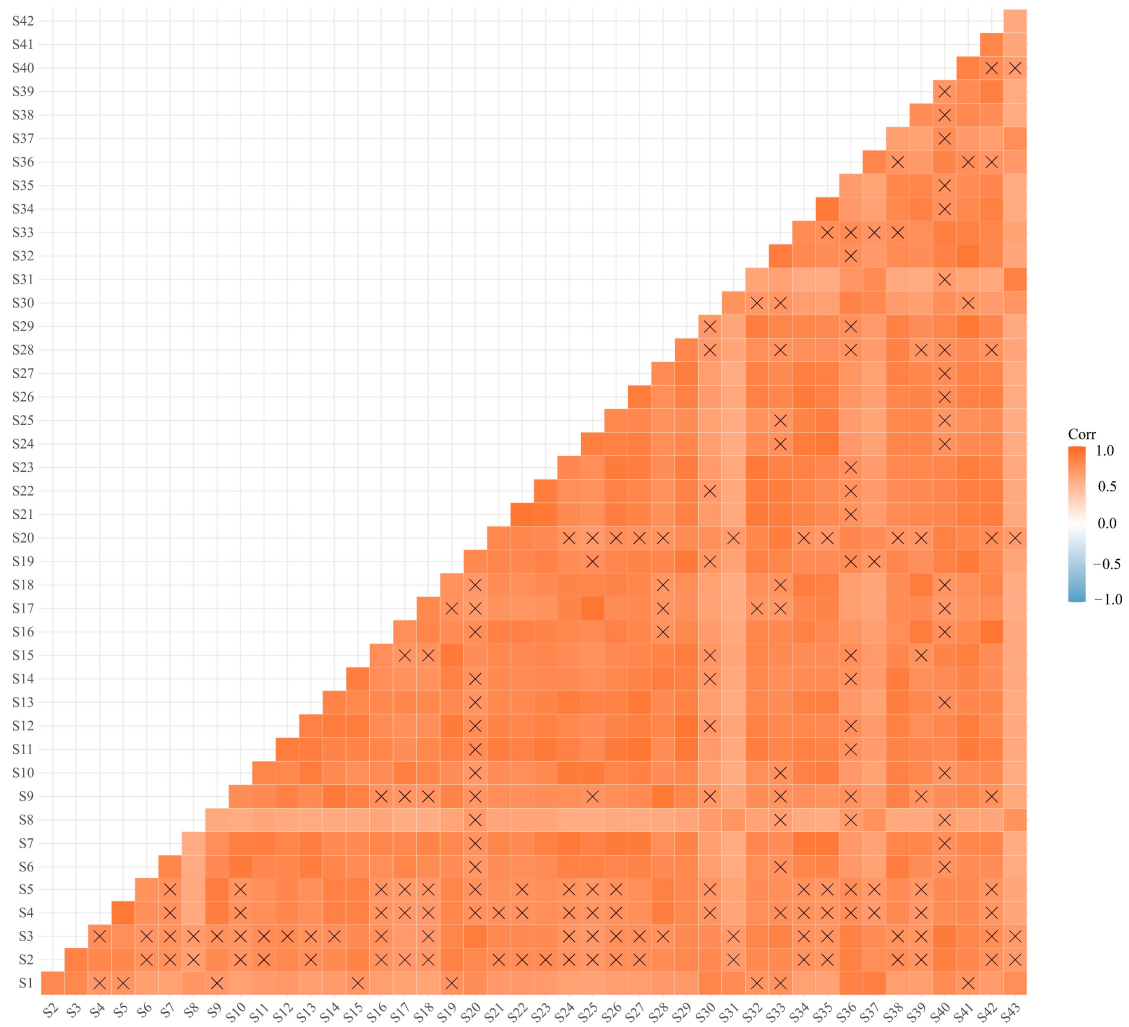

**Figure S2(a).** Correlation coefficient graph for processed precipitation series of all 43 stations with  $n_{EI} = 3$ . “X” denotes a significant correlation level of over 95%.

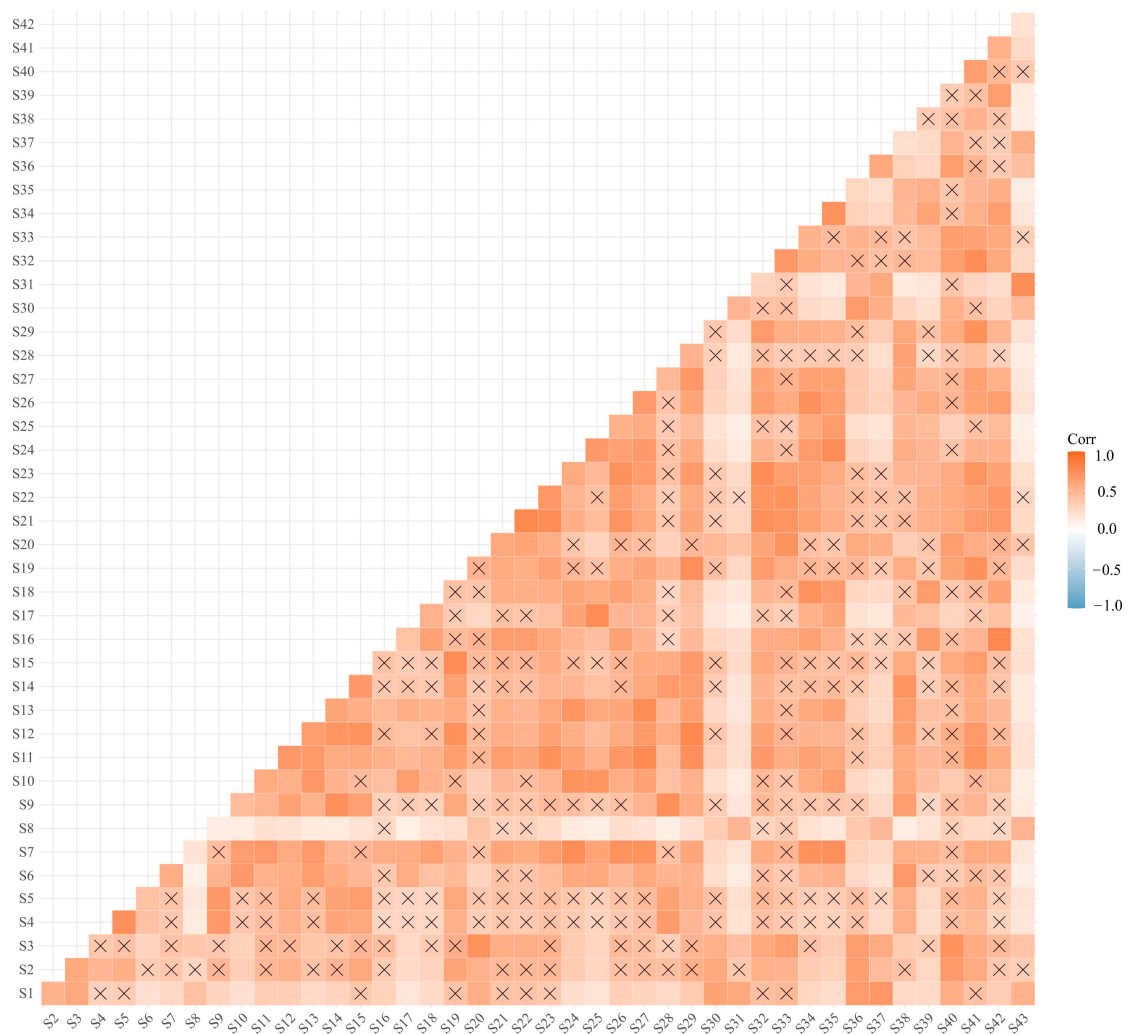

**Figure S2(b).** Correlation coefficient graph for original daily precipitation series of all 43 stations. “x” denotes a significant correlation level of over 95%.

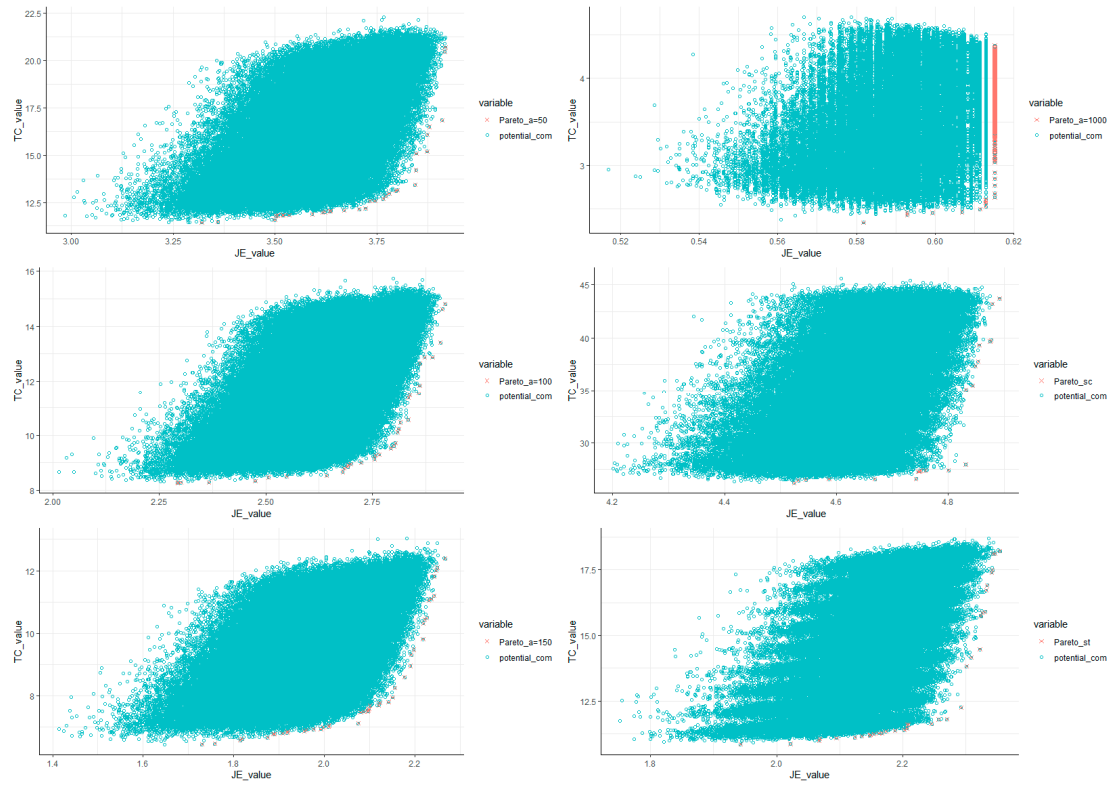

**Figure S3.** Process of the optimization of network design based on the Pareto solution for three discretization methods. Pareto\_a=50, 100, 150 and 1000 denoted the Pareto solution set through flood function-based discretization approach with 4 kinds of parameters. Pareto\_sc denoted the Pareto solution set through EWH-Sc method while st denoted Pareto solution set through the EWH-St method in the above figure. Potential\_com denoted 90000 potential gauge combinations.
